# Supplementary material for: The application of aptamer Apt-236 targeting PvpA protein in the detection of antibodies against Mycoplasma gallisepticum
Source: Royal Society of Chemistry journal article supplement (doi:10.1039/d1ay00515d), 2021-01-01
Supplement: d1ay00515d1.pdf [file d1ay00515d1.pdf]

| Name   | Aptmaer                                  | In the Fifth round |              |               | In the Second round |              |               | Enrichment (%) |
|--------|------------------------------------------|--------------------|--------------|---------------|---------------------|--------------|---------------|----------------|
|        |                                          | Ranking            | Repeat times | abundance (%) | Rankin g            | Repeat times | abundance (%) |                |
| apt-1  | GAGCAGCGCGACTGTCCGAGCCAATCCGCCATCTAGTGGT | 1                  | 63218        | 3.86          | 2                   | 2144         | 0.19          | 20.47          |
| apt-2  | GGCGTAGCACTGTCCCATTCCTGACACTATCGCACAGTCG | 2                  | 42480        | 2.59          | 1                   | 2164         | 0.19          | 13.63          |
| apt-3  | GAGCAACGCGACTGTCTGAGCCAACCTGACATCTAGTGGT | 3                  | 35472        | 2.16          | 3                   | 2090         | 0.18          | 11.79          |
| apt-4  | GTGCGAAGCGCCTGGACTGCACATCCCATTCCTTCTACCG | 4                  | 28375        | 1.73          | 4                   | 1972         | 0.17          | 9.99           |
| apt-5  | GGCGTAGCACTGTCCCGTTCCTAACACTACCACACAGTCG | 5                  | 21248        | 1.30          | 7                   | 857          | 0.08          | 17.22          |
| apt-6  | GTGCGAAGCGCCTGGACTGTACATCCCACTCCCTCTACCG | 6                  | 14669        | 0.90          | 6                   | 905          | 0.08          | 11.26          |
| apt-7  | GGAGCAAGGCGACCTGGCCACAAGCAAACCCACTTCGCC  | 7                  | 11767        | 0.72          | 17                  | 401          | 0.04          | 20.38          |
| apt-8  | GAGCAACGCGACTGTCTGAACCAATCTGACATCAAGTGGT | 8                  | 8318         | 0.51          | 8                   | 675          | 0.06          | 8.56           |
| apt-9  | GAGCAACGCGACTGTCCGAGCCAATCCGCCATCTAGTGGT | 9                  | 8274         | 0.50          | 23                  | 244          | 0.02          | 23.55          |
| apt-10 | GGGAGGCGGGTGGGTCGTCGGGGTGCCTCGTTCTGTGTGG | 10                 | 8136         | 0.50          | 12                  | 587          | 0.05          | 9.62           |
| apt-11 | GTGCGAAGCGCCTGGACTGCACATCCCACTCCTTCTGCCG | 11                 | 7743         | 0.47          | 15                  | 465          | 0.04          | 11.56          |
| apt-12 | GAGCAACGCGACTGTCTGAAACAATCTGGCATCTGGTGGT | 12                 | 5872         | 0.36          | 13                  | 534          | 0.05          | 7.64           |
| apt-13 | GGCACATTGCAGGGGAGGCGGGTGGGGATGCATCGGCCCG | 13                 | 5867         | 0.36          | 16                  | 434          | 0.04          | 9.39           |
| apt-14 | GCGAGGTACGAGCCTGGACACACATAATACGTCCGTTGGC | 14                 | 5801         | 0.35          | 9                   | 661          | 0.06          | 6.09           |
| apt-15 | GCGAGGTACGAGCCTGGACACACACAATACGTCCATTGGC | 15                 | 5511         | 0.34          | 10                  | 660          | 0.06          | 5.80           |
| apt-16 | GCGAGGTACGAGCCTGGACACACACAATACGTCCATTAGC | 16                 | 5505         | 0.34          | 11                  | 655          | 0.06          | 5.84           |
| apt-17 | GTGCGAAGCGCCTGTACTGTGCATCCACACCTTTTGTGCG | 17                 | 5424         | 0.33          | 20                  | 287          | 0.03          | 13.12          |
| apt-18 | GGCGTAGCACTGTCCCGTTCCTAACACTATCGCACAGTCG | 18                 | 5161         | 0.31          | 30                  | 162          | 0.01          | 22.12          |
| apt-19 | GAGCAACGCGACTGTCTGAACCAATCTGACATCTAGTGGT | 19                 | 4506         | 0.27          | 26                  | 203          | 0.02          | 15.41          |
| apt-20 | GGCGTAGCACTGTCCCATTCCTAACACTATCGCACAGTCG | 20                 | 4475         | 0.27          | 25                  | 212          | 0.02          | 14.66          |
| apt-21 | GGGACGGAACGGACCCTGCCAACACAAGCCGAATGTGCTC | 21                 | 4008         | 0.24          | 54                  | 70           | 0.01          | 39.76          |
| apt-22 | GAGCAACGCGACTGTCCGGACCAATCTGGCACCTGGTGGT | 22                 | 3651         | 0.22          | 39                  | 87           | 0.01          | 29.14          |
| apt-23 | CACGTAGGGCTGGCCGGTCTCAGGATTGTACTACGGATG  | 23                 | 3634         | 0.22          | 14                  | 470          | 0.04          | 5.37           |
| apt-24 | GGGAGGCGGGCGGGTGGCTTGCGGTCAGCGTTATGTGCGG | 24                 | 3442         | 0.21          | 22                  | 267          | 0.02          | 8.95           |
| apt-25 | GAGCAACGCGACTGTCTGGACCAATCTGACATTTAGTGGT | 25                 | 3187         | 0.19          | 21                  | 269          | 0.02          | 8.23           |
| apt-26 | GCGAGGTACGAGCCTGGACACACACAATACATCCGTTGGC | 26                 | 3039         | 0.19          | 19                  | 323          | 0.03          | 6.53           |
| apt-27 | GCGAGGCACGAGCCTGGACACACACAATACGTCCGTTACC | 27                 | 3036         | 0.19          | 24                  | 222          | 0.02          | 9.50           |
| apt-28 | GAGCAGCGCGACTGTCCGAACCAAAGTACATCTGGCGGT  | 28                 | 2934         | 0.18          | 45                  | 82           | 0.01          | 24.85          |
| apt-29 | GTGCGAAGCGCCTGGACTGTACATCCTACTCCTTCTGCCG | 29                 | 2692         | 0.16          | 33                  | 121          | 0.01          | 15.45          |
| apt-30 | GCGAGGTACGAGCCTGGACACACACAATACGCCGTTGCCA | 30                 | 2568         | 0.16          | 18                  | 359          | 0.03          | 4.97           |
| apt-31 | GAGCAGCGCGACTGTCTGAGCCAACCTGACATCTAGTGGT | 31                 | 2336         | 0.14          | 60                  | 64           | 0.01          | 25.35          |
| apt-32 | GCGAGGTACGAGCCTGGACACACACAATACGTCCGTTACC | 32                 | 2294         | 0.14          | 38                  | 106          | 0.01          | 15.03          |
| apt-33 | GAGCAACGCGACTGTCTGAACCAACTGGCATCTGGTGGT  | 33                 | 2089         | 0.13          | 37                  | 106          | 0.01          | 13.68          |
| apt-34 | ATCGGAAGAGCGTCGTGTAGGGAAAGAGTGTAGATCTCGG | 34                 | 2057         | 0.13          | 5                   | 1501         | 0.13          | 0.95           |
| apt-35 | GTGCGAAGCGCCTGGACTGCACATCCCACTCCCTCTACCG | 35                 | 1921         | 0.12          | 51                  | 75           | 0.01          | 17.79          |

|        |                                           |    |      |      |     |     |      |       |
|--------|-------------------------------------------|----|------|------|-----|-----|------|-------|
| apt-36 | GGCGTAGCACTGTCCCATTCCCTAACACTACCACACAGTCG | 36 | 1687 | 0.10 | 65  | 50  | 0.00 | 23.43 |
| apt-37 | GAGCAACGCGACTGTCTGAACCAATCCGACATCTGGTGGT  | 37 | 1680 | 0.10 | 40  | 87  | 0.01 | 13.41 |
| apt-38 | GGCGTAGCACTGTCCCATTCCCTAACACTATCACACAGTCG | 38 | 1485 | 0.09 | 58  | 65  | 0.01 | 15.86 |
| apt-39 | GAGCAACGCGACTGTCTGAACCAATCTGACATCTGGTGGT  | 39 | 1393 | 0.09 | 61  | 58  | 0.01 | 16.68 |
| apt-40 | GCGAGGTACGAGCCTGGACACACACAATACGTCCGTTGGC  | 40 | 1358 | 0.08 | 41  | 87  | 0.01 | 10.84 |
| apt-41 | GCGAGGAACGAGCCTGGACACACACAATACGTCCATTGGC  | 41 | 1329 | 0.08 | 44  | 83  | 0.01 | 11.12 |
| apt-42 | GTGCGAAGCGCCTGGACTGCACATCCCCTCCTTCTGCCA   | 42 | 1283 | 0.08 | 27  | 193 | 0.02 | 4.62  |
| apt-43 | GTGCGAAGCGCCTGGACTGCACATCCCCTCCTTCTACCG   | 43 | 1264 | 0.08 | 73  | 46  | 0.00 | 19.08 |
| apt-44 | GGCGTAGCACTGTCCCGTTCCTGACACTATCGCACAGTCG  | 44 | 1257 | 0.08 | 76  | 44  | 0.00 | 19.84 |
| apt-45 | GCGAGGAACGAGCCTGGACACACACAATACGTCCATTAGC  | 45 | 1208 | 0.07 | 56  | 67  | 0.01 | 12.52 |
| apt-46 | GTGCGAAGCGCCTGGACTGTACATCCCACCCCTTCTGCCG  | 46 | 1203 | 0.07 | 66  | 50  | 0.00 | 16.71 |
| apt-47 | GTGCGAAGCGCCTGTACTGTGCATCCCCTTCTTCTGTCTG  | 47 | 1197 | 0.07 | 59  | 65  | 0.01 | 12.79 |
| apt-48 | GTGCGAAGCGCCTGGACTGTACATCCCCTCCTTCTGCCG   | 48 | 1114 | 0.07 | 75  | 45  | 0.00 | 17.19 |
| apt-49 | GCGAGGAACGAGCCTGGACACACACAATACGCCGTTGCCA  | 49 | 1102 | 0.07 | 36  | 108 | 0.01 | 7.09  |
| apt-50 | GCGAGGAACGAGCCTGGACACACACAATACGTCCGTTGGC  | 50 | 1070 | 0.07 | 32  | 130 | 0.01 | 5.72  |
| apt-51 | GTGCGAAGCGCCTGGACTGTACATCCCATTCTTCTACCG   | 51 | 1007 | 0.06 | 69  | 49  | 0.00 | 14.27 |
| apt-52 | GAGCAACGCGACTGTCTGAACCAACCTGACATCTAGTGGT  | 52 | 989  | 0.06 | 85  | 35  | 0.00 | 19.62 |
| apt-53 | GAGCAACGCGACTGTCCGGACCAATCTGGCATCTGGTGGT  | 53 | 924  | 0.06 | 145 | 16  | 0.00 | 40.10 |
| apt-54 | GACACGGTGCTGCAATACTCATGGACAGGAGCAACGCGAC  | 54 | 888  | 0.05 | 49  | 78  | 0.01 | 7.91  |
| apt-55 | CACGAAGGGCTGGCCAGGCTTCAGGGCTATACTCCAGACC  | 55 | 872  | 0.05 | 103 | 26  | 0.00 | 23.29 |
| apt-56 | GAGCAACGCGACTGTCTGAGCCAATCCGCCATCTAGTGGT  | 56 | 870  | 0.05 | 91  | 31  | 0.00 | 19.49 |
| apt-57 | GCGAGGAACGAGCCTGGACACACATAATACGTCCGTTGGC  | 57 | 851  | 0.05 | 86  | 35  | 0.00 | 16.88 |
| apt-58 | GACACGGTGCTGCAATACTCATGGACAGGAGCAGCGCGAC  | 58 | 848  | 0.05 | 35  | 116 | 0.01 | 5.08  |
| apt-59 | GCGAGGAACGAGCCTGGACACACACAATACGTCCGTTACC  | 59 | 834  | 0.05 | 70  | 48  | 0.00 | 12.06 |
| apt-60 | GTGCGAAGCGCCTGGACTGTACATCCCCTCCTTCTACCG   | 60 | 833  | 0.05 | 78  | 39  | 0.00 | 14.83 |
| apt-61 | GACACGGTGCTGCAATACTCATGGACAGGGCGTAGCACTG  | 61 | 820  | 0.05 | 53  | 72  | 0.01 | 7.91  |
| apt-62 | GCGAGGAACGAGCCTGGACACACACAATACATCCGTTGGC  | 62 | 816  | 0.05 | 68  | 49  | 0.00 | 11.56 |
| apt-63 | GAGCAGCGCGACTGTCCGAACCAATCCGCCATCTAGTGGT  | 63 | 773  | 0.05 | 159 | 15  | 0.00 | 35.78 |
| apt-64 | GTGCGAAGCGCCTGTACTGTACATCCCCTCCTTCTACCG   | 64 | 772  | 0.05 | 82  | 37  | 0.00 | 14.49 |
| apt-65 | CACGAAGGGCTGGCCGGGTCTCAGGATTGTACTACGGATG  | 65 | 766  | 0.05 | 67  | 49  | 0.00 | 10.86 |
| apt-66 | GGCGTAGCACTGTCCCGTTCCTAACATTATCGCACAGTCG  | 66 | 736  | 0.04 | 110 | 25  | 0.00 | 20.44 |
| apt-67 | GTGCGAAGCGCCTGGACTGCACATCCCATTCTTCTGCCG   | 67 | 723  | 0.04 | 96  | 30  | 0.00 | 16.73 |
| apt-68 | GACACGGTGCTGCAATACTCATGGACAGGTGCGAAGCGCC  | 68 | 705  | 0.04 | 48  | 79  | 0.01 | 6.20  |
| apt-69 | GCGAGGTACGAGCCTGGACACACACAATACACCGTTGCCA  | 69 | 696  | 0.04 | 46  | 82  | 0.01 | 5.89  |
| apt-70 | CACGAAGGGCTGGCCAGGTTTCAGAGTCATACTCCAGATG  | 70 | 695  | 0.04 | 31  | 132 | 0.01 | 3.66  |
| apt-71 | GAGCAACGCGACTGTCTAAACCAATCTGACATCTAGTGGT  | 71 | 666  | 0.04 | 57  | 66  | 0.01 | 7.01  |
| apt-72 | GAGCAACGCGACTGTCTGAACCAATCCGCCATCTAGTGGT  | 72 | 653  | 0.04 | 114 | 22  | 0.00 | 20.61 |
| apt-73 | GAGCAGCGCGACTGTCCGAGCCGATCCGCCATCTAGTGGT  | 73 | 634  | 0.04 | 213 | 11  | 0.00 | 40.02 |

|         |                                          |     |     |      |     |     |      |       |
|---------|------------------------------------------|-----|-----|------|-----|-----|------|-------|
| apt-74  | CACGAAGGGCTGGCCGAACCTCAAGGACGTACTCTAGACC | 74  | 627 | 0.04 | 89  | 31  | 0.00 | 14.04 |
| apt-75  | CACGGAGGGCTGGCCAGGCTTCAAGATCGTGCTCCAGATG | 75  | 627 | 0.04 | 29  | 168 | 0.01 | 2.59  |
| apt-76  | GGCGTAGCACTGTCCCATTCTGACACTATCACACAGTCG  | 76  | 618 | 0.04 | 100 | 29  | 0.00 | 14.80 |
| apt-77  | CCCGGAGGGATGGCCAGGCTTCAAGATCGTGCTCCAGATG | 77  | 609 | 0.04 | 122 | 20  | 0.00 | 21.14 |
| apt-78  | GGGAGGCGGGTGGGGCTGCTGCACAGTGTGTTACGGTTGG | 78  | 607 | 0.04 | 42  | 86  | 0.01 | 4.90  |
| apt-79  | GGCGTAGCACTGTCCCATTCTGACACTACCACACAGTCG  | 79  | 595 | 0.04 | 150 | 16  | 0.00 | 25.82 |
| apt-80  | GAGCAACGCGACTGTCTGAGCCAACCTGACATCAAGTGGT | 80  | 576 | 0.04 | 158 | 15  | 0.00 | 26.66 |
| apt-81  | CACGAAGGGCTGGCCGGGTTTCAGAGTCATACTCCAGTCG | 81  | 573 | 0.03 | 28  | 172 | 0.02 | 2.31  |
| apt-82  | GTGCGAAGCGCCTGGACTGCACATCCCATTCCCTCTACCG | 82  | 550 | 0.03 | 93  | 31  | 0.00 | 12.32 |
| apt-83  | GAGCAACGCGACTGTCTGAACCAACCTGGCATCTGGTGGT | 83  | 534 | 0.03 | 111 | 24  | 0.00 | 15.45 |
| apt-84  | GGCGTAGCACTGTCCCATTTCCGACACTATCGCACAGTCG | 84  | 530 | 0.03 | 175 | 14  | 0.00 | 26.29 |
| apt-85  | GCGAGGTACGAGCCTGGACACGCACAATACGTCCGTTGGC | 85  | 510 | 0.03 | 64  | 50  | 0.00 | 7.08  |
| apt-86  | GAGCAACGCGACTGTCTGAACCAATCTGGCATCTGGTGGT | 86  | 500 | 0.03 | 81  | 38  | 0.00 | 9.14  |
| apt-87  | GCGAGGTACGAGCCTGGACACACACAATACGTCCGTTAGC | 87  | 490 | 0.03 | 98  | 29  | 0.00 | 11.73 |
| apt-88  | GTGCGAAGCGCCTGTACCGTACACCCACCCCTTTTGCCG  | 88  | 485 | 0.03 | 178 | 14  | 0.00 | 24.06 |
| apt-89  | GAGCAACGCGACTGTCTGGGCAACCTGACATCTAGTGGT  | 89  | 471 | 0.03 | 124 | 20  | 0.00 | 16.35 |
| apt-90  | GAGCAACGCGACTGTCTGAACGAATCTGACATCTGGTGGT | 90  | 464 | 0.03 | 250 | 9   | 0.00 | 35.80 |
| apt-91  | GGGAGGTGGGTGGGCGTGCCATACGTGACGGCTACTGTGG | 91  | 458 | 0.03 | 50  | 78  | 0.01 | 4.08  |
| apt-92  | GACGGGGTGCTGCAATACTCATGGACAGGAGCAACGCGAC | 92  | 457 | 0.03 | 90  | 31  | 0.00 | 10.24 |
| apt-93  | GAGCAACGCGACTGTCCGAACCAAACTGACATCTGGCGGT | 93  | 454 | 0.03 | 123 | 20  | 0.00 | 15.76 |
| apt-94  | GGCGTAGCACTGTCCCATTCTGACACTACCGCACAGTCG  | 94  | 453 | 0.03 | 105 | 26  | 0.00 | 12.10 |
| apt-95  | GAGCAGCGCGACTGTCCGAGCCAATCCGCCGTCTAGTGGT | 95  | 451 | 0.03 | 134 | 18  | 0.00 | 17.40 |
| apt-96  | GCGAGGTACGAGCCTGGACACACATAATACGTCCATTGGC | 96  | 448 | 0.03 | 116 | 22  | 0.00 | 14.14 |
| apt-97  | GCGAGGCACGAGCCTGGACACACACAATACGTCCATTGGC | 97  | 447 | 0.03 | 107 | 25  | 0.00 | 12.42 |
| apt-98  | GAGCAGCGCGACTGTCTGAACCAATCTGACATCAAGTGGT | 98  | 446 | 0.03 | 254 | 9   | 0.00 | 34.41 |
| apt-99  | GTGCGAAGCGCCTGGACTGCACATCCCCTCCCTCTGCCG  | 99  | 440 | 0.03 | 106 | 26  | 0.00 | 11.75 |
| apt-100 | GGCGTAGCACTGTCCCATTCTAACGCTGTGCGCACAGTCA | 100 | 436 | 0.03 | 88  | 33  | 0.00 | 9.17  |
| apt-101 | GCGAGGCACGAGCCTGGACACACACAATACGTCCATTAGC | 101 | 432 | 0.03 | 112 | 24  | 0.00 | 12.50 |
| apt-102 | GGCGCAGCACTGTCCCATTCTGACACTATCGCACAGTCG  | 102 | 418 | 0.03 | 109 | 25  | 0.00 | 11.61 |
| apt-103 | GAGCAACGCGACTGTCTGAACCAACTGACATCTGGTGGT  | 103 | 417 | 0.03 | 131 | 18  | 0.00 | 16.09 |
| apt-104 | GAGCAGCGCGACTGTCCGACCAATCTGGCACCTGGTGGT  | 104 | 413 | 0.03 | 443 | 6   | 0.00 | 47.80 |
| apt-105 | GTGCGAAGCGCCTGGACTGTACATAACACTCCCTCTACCG | 105 | 392 | 0.02 | 97  | 30  | 0.00 | 9.07  |
| apt-106 | GAGCAGCGCGACTGTCTGAAACAATCTGGCATCTGGTGGT | 106 | 391 | 0.02 | 148 | 16  | 0.00 | 16.97 |
| apt-107 | GCGAGGCACGAGCCTGGACACACACAATACATCCGTTGGC | 107 | 391 | 0.02 | 47  | 81  | 0.01 | 3.35  |
| apt-108 | GACGGGGTGCTGCAATACTCATGGACAGGAGCAGCGCGAC | 108 | 389 | 0.02 | 77  | 41  | 0.00 | 6.59  |
| apt-109 | GACGGGGTGCTGCAATACTCATGGACAGGGCGTAGCACTG | 109 | 384 | 0.02 | 80  | 38  | 0.00 | 7.02  |
| apt-110 | GGCGTAGCACTGTCCCGTTCTAACACCATCGCACAGTCG  | 110 | 380 | 0.02 | 187 | 13  | 0.00 | 20.30 |
| apt-111 | GCGAGGTACGAGCCTGGACACACACAATACGTTGTTGGC  | 111 | 375 | 0.02 | 99  | 29  | 0.00 | 8.98  |

|         |                                           |     |     |      |       |    |      |       |
|---------|-------------------------------------------|-----|-----|------|-------|----|------|-------|
| apt-112 | GTGCGAAGCGCCTGTACTGTACGTCCCCTCTGCCG       | 112 | 370 | 0.02 | 359   | 7  | 0.00 | 36.70 |
| apt-113 | GTGCGAAGCGCCTGGACTGTACATCCCCTCTGCCG       | 113 | 369 | 0.02 | 241   | 10 | 0.00 | 25.62 |
| apt-114 | GGCGTAGCACTGTCCCATTCCCGACACTATCGCACAGTCG  | 114 | 368 | 0.02 | 262   | 9  | 0.00 | 28.39 |
| apt-115 | GACGGGGTGCTGCAATACTCATGGACAGGTGCGAAGCGCC  | 115 | 367 | 0.02 | 84    | 35 | 0.00 | 7.28  |
| apt-116 | GCGAGGCACGAGCCTGGACACACACAATACGTCCGTTAGC  | 116 | 356 | 0.02 | 71    | 48 | 0.00 | 5.15  |
| apt-117 | GCGAGGTACGAGCCTGGACACACATAATACGTCCGTTACC  | 117 | 354 | 0.02 | 171   | 14 | 0.00 | 17.56 |
| apt-118 | GGGCAGCGCGACTGTCCGAGCCAATCCGCCATCTAGTGGT  | 118 | 352 | 0.02 | 128   | 19 | 0.00 | 12.86 |
| apt-119 | GTGCGAAGCGCCTGGACCGCACATCCCATTCTTCTACCG   | 119 | 347 | 0.02 | 95    | 30 | 0.00 | 8.03  |
| apt-120 | GAGCAGCGCGACTGTCCGAGCCAACCTGACATCTAGTGGT  | 120 | 340 | 0.02 | 323   | 7  | 0.00 | 33.73 |
| apt-121 | GAGCAACGCGACTGTCTGAACGAATCTGACATCAAGTGGT  | 121 | 336 | 0.02 | 193   | 12 | 0.00 | 19.44 |
| apt-122 | GGGAGGCGGGTGGGCCATATTTCGAGATCTTTGTCTGTGC  | 122 | 334 | 0.02 | 43    | 84 | 0.01 | 2.76  |
| apt-123 | CACGAAGGGCTGGCCAGGCTTCAGGGTCGTAATCCAGACC  | 123 | 320 | 0.02 | 23903 | 3  | 0.00 | 74.07 |
| apt-124 | GAGCAGCGCGACTGTCCGAGTCAATCCGCCATCTAGTGGT  | 124 | 316 | 0.02 | 214   | 11 | 0.00 | 19.95 |
| apt-125 | GAGCAACGCGACTGTCTGAACGAATCTGACATCTAGTGGT  | 125 | 314 | 0.02 | 277   | 8  | 0.00 | 27.25 |
| apt-126 | GGCGTAGCACTGTCCCGTTCCTAACACTATCACACAGTCG  | 126 | 314 | 0.02 | 263   | 9  | 0.00 | 24.23 |
| apt-127 | CACGAAGGGCTGGCCGGGTTTCAGGGTCATACTTCAGTCG  | 127 | 307 | 0.02 | 52    | 74 | 0.01 | 2.88  |
| apt-128 | GTGCGAAGCGCCTGTACTGTACATCCTACTCCTTCTGTGC  | 128 | 306 | 0.02 | 101   | 29 | 0.00 | 7.33  |
| apt-129 | GAGCAACGCGACTGTCTGAGCCAACCTGACGTCTAGTGGT  | 129 | 303 | 0.02 | 133   | 18 | 0.00 | 11.69 |
| apt-130 | GTGCGAAGCGCCTGGACTGTACATCCCCTCTTTTGCCG    | 130 | 302 | 0.02 | 496   | 6  | 0.00 | 34.95 |
| apt-131 | GCGAGGTACGAGCCTGGACACACATAATACGTCCATTAGC  | 131 | 298 | 0.02 | 142   | 17 | 0.00 | 12.17 |
| apt-132 | GCGAGGCACGAGCCTGGACACACACAATACGTTCGTTGGC  | 132 | 292 | 0.02 | 62    | 57 | 0.01 | 3.56  |
| apt-133 | GAGCAGTGCAGACTGTCCGAGCCAATCCGCCATCTAGTGGT | 133 | 291 | 0.02 | 5275  | 4  | 0.00 | 50.52 |
| apt-134 | GCGAGGCACGAGCCTGGACACACACAATACGTCCGTTGGC  | 134 | 289 | 0.02 | 136   | 18 | 0.00 | 11.15 |
| apt-135 | GAGCAGCGCGACTGTCCGAGCCAATCCGCCACCTAGTGGT  | 135 | 285 | 0.02 | 147   | 16 | 0.00 | 12.37 |
| apt-136 | GAGCAGCGCGACTGTCCGAACCAAACCTGACATCTGGCGAT | 136 | 283 | 0.02 | 321   | 7  | 0.00 | 28.07 |
| apt-137 | GCGAGGCACGAGCCTGGACACACATAATACGTCCGTTGGC  | 137 | 283 | 0.02 | 92    | 31 | 0.00 | 6.34  |
| apt-138 | GCGAGGCACGAGCCTGGACACACACAATAGGTCCGTTGGC  | 138 | 278 | 0.02 | 55    | 68 | 0.01 | 2.84  |
| apt-139 | GTGCGAAGCGCCTGTACTGTACATCCCCTCTTTTGCCG    | 139 | 278 | 0.02 | 129   | 19 | 0.00 | 10.16 |
| apt-140 | GGCACGGTGCTGCAATACTCATGGACAGGAGCAACGCGAC  | 140 | 273 | 0.02 | 125   | 20 | 0.00 | 9.48  |
| apt-141 | GGGCAACGCGACTGTCTGAGCCAACCTGACATCTAGTGGT  | 141 | 273 | 0.02 | 151   | 16 | 0.00 | 11.85 |
| apt-142 | GGCGTAGCACTGTCCCATTCTGACACTATCGCGCAGTCG   | 142 | 270 | 0.02 | 340   | 7  | 0.00 | 26.78 |
| apt-143 | GTGCAGCGCGACTGTCCGAGCCAATCCGCCATCTAGTGGT  | 143 | 270 | 0.02 | 347   | 7  | 0.00 | 26.78 |
| apt-144 | GAGCAGCGCGACTGTCCGAGCCAATCCACCATCTAGTGGT  | 144 | 268 | 0.02 | 160   | 15 | 0.00 | 12.41 |
| apt-145 | GGCGCAGCACTGTCCCGTTCCTAACACTACCACACAGTCG  | 145 | 268 | 0.02 | 185   | 13 | 0.00 | 14.32 |
| apt-146 | GGCGTAGCACTGTCCCATTCTGACACTATCGCACGGTTCG  | 146 | 267 | 0.02 | 174   | 14 | 0.00 | 13.24 |
| apt-147 | GAGCAACGCGACTGTCTGAGCCAACCTGACATCTGGTGGT  | 147 | 263 | 0.02 | 437   | 6  | 0.00 | 30.44 |
| apt-148 | GAGCAGCGCGACTGTCCGAGCCAATCCGCCATCTGGTGGT  | 148 | 263 | 0.02 | 325   | 7  | 0.00 | 26.09 |
| apt-149 | CACGAAGGGCTGGCCAGGTTTCAGAGTCATACTCCAGTCG  | 149 | 260 | 0.02 | 153   | 15 | 0.00 | 12.04 |

|         |                                          |     |     |      |      |    |      |       |
|---------|------------------------------------------|-----|-----|------|------|----|------|-------|
| apt-150 | GGCGTAGCACTGTCCCATTCTGACACTATCGCACAGCCG  | 150 | 258 | 0.02 | 201  | 12 | 0.00 | 14.93 |
| apt-151 | GGCGTAGCACTGTCCCATTCTGGCACTATCGCACAGTCG  | 151 | 251 | 0.02 | 186  | 13 | 0.00 | 13.41 |
| apt-152 | GAGCAGCGCGACTGTCCGAGCCAATCCGACATCTAGTGGT | 152 | 250 | 0.02 | 5265 | 4  | 0.00 | 43.40 |
| apt-153 | GAGCAACGCGACTGTCTGGACCAATCTGACATCTAGTGGT | 153 | 249 | 0.02 | 940  | 5  | 0.00 | 34.58 |
| apt-154 | GCGCAACGCGACTGTCTGAGCCAACCTGACATCTAGTGGT | 154 | 249 | 0.02 | 290  | 8  | 0.00 | 21.61 |
| apt-155 | GAGCAGCGCGACTGTCTGAGCCAATCCGCCATCTAGTGGT | 155 | 248 | 0.02 | 215  | 11 | 0.00 | 15.66 |
| apt-156 | GAGCAACGCGACTGTCTGAGCCAATCTGACATCTAGTGGT | 156 | 243 | 0.01 | 195  | 12 | 0.00 | 14.06 |
| apt-157 | GAGCAGCGCGACTGTCTGAACCAATCTGACATCTAGTGGT | 157 | 240 | 0.01 | 946  | 5  | 0.00 | 33.33 |
| apt-158 | GGCGCAGCACTGTCCCGTTCCTAACACTATCGCACAGTCG | 158 | 240 | 0.01 | 466  | 6  | 0.00 | 27.78 |
| apt-159 | GTGCGAAGCGCCTGGACTGTACATCCCATCCCTTCTGCCG | 159 | 239 | 0.01 | 300  | 8  | 0.00 | 20.74 |
| apt-160 | GCGAGGAACGAGCCTGGACACACACAATACGTCCGTTGGA | 160 | 238 | 0.01 | 115  | 22 | 0.00 | 7.51  |
| apt-161 | GGCACGGTGCTGCAATACTCATGGACAGGAGCAGCGCGAC | 161 | 234 | 0.01 | 83   | 36 | 0.00 | 4.51  |
| apt-162 | CACGGAGGGCTGGCCAGGCTTCAAGGTTGTGTTCCAGATG | 162 | 229 | 0.01 | 182  | 13 | 0.00 | 12.23 |
| apt-163 | GAGCAACGCGACTGTCTGAGCCAATCTGACGTCTGGTGGT | 163 | 228 | 0.01 | 233  | 10 | 0.00 | 15.83 |
| apt-164 | GAGCAGCGCGACTGTCCGAGCCAATCTGCCATCTAGTGGT | 164 | 228 | 0.01 | 326  | 7  | 0.00 | 22.62 |
| apt-165 | GCGAGGTACGAGCCTGGACACACACAATACGTCCGTTGGA | 165 | 227 | 0.01 | 219  | 11 | 0.00 | 14.33 |
| apt-166 | GGCACGGTGCTGCAATACTCATGGACAGGGCGTAGCACTG | 166 | 227 | 0.01 | 94   | 30 | 0.00 | 5.25  |
| apt-167 | GAGCAAGGCGACCTGGCCCACAAGCAAACCCACTTCGCCG | 167 | 226 | 0.01 | 5259 | 4  | 0.00 | 39.23 |
| apt-168 | GCACGGTGCTGCAATACTCATGGACAGGGCGTAGCACTGT | 168 | 225 | 0.01 | 149  | 16 | 0.00 | 9.76  |
| apt-169 | CACGAAGGGCTGGCCGGGTTTCAGAGTCATACTCCAGATG | 169 | 224 | 0.01 | 181  | 13 | 0.00 | 11.96 |
| apt-170 | GTGCGAAGCGCCTGGACTGTACATCCCACTCCCTTTGCCA | 170 | 223 | 0.01 | 164  | 15 | 0.00 | 10.32 |
| apt-171 | GTGCGAAGCGCCTGGACTGTACATCCCACTCCCCCTACCG | 171 | 222 | 0.01 | 205  | 12 | 0.00 | 12.85 |
| apt-172 | GAGCAGCGCGACTGTCCGGGCAATCCGCCATCTAGTGGT  | 172 | 219 | 0.01 | 198  | 12 | 0.00 | 12.67 |
| apt-173 | GGCGTAGCACTGTCCCCTCTGACACTATCGCACAGTCG   | 173 | 219 | 0.01 | 6794 | 4  | 0.00 | 38.02 |
| apt-174 | GCACGGTGCTGCAATACTCATGGACAGGAGCAACGCGACT | 174 | 218 | 0.01 | 161  | 15 | 0.00 | 10.09 |
| apt-175 | GTGCGAAGCGCCTGGACTGCACATCCCATTCCTCCTACCG | 175 | 215 | 0.01 | 204  | 12 | 0.00 | 12.44 |
| apt-176 | GAGCAACGCGACTGTCTGAACCAATCCGACATCTAGTGGT | 176 | 211 | 0.01 | 167  | 14 | 0.00 | 10.47 |
| apt-177 | GAGCAGCGCGACTGTCCGAGCCAACCCGCCATCTAGTGGT | 177 | 211 | 0.01 | 196  | 12 | 0.00 | 12.21 |
| apt-178 | GCGCAGCGCGACTGTCCGAGCCAATCCGCCATCTAGTGGT | 178 | 207 | 0.01 | 163  | 15 | 0.00 | 9.58  |
| apt-179 | GAGCAACGCGACTGTCTGAGCCAACCCGACATCTAGTGGT | 179 | 205 | 0.01 | 251  | 9  | 0.00 | 15.82 |
| apt-180 | GCGAGGTACGAGCCTGGACACACACAATAGGTCCGTTGGC | 180 | 204 | 0.01 | 221  | 11 | 0.00 | 12.88 |
| apt-181 | GGCGTAGCACTGTCCCATTCTGACACCATCGCACAGTCG  | 181 | 203 | 0.01 | 470  | 6  | 0.00 | 23.49 |
| apt-182 | GGCGTAGCACTGTCCCATTCTGACACTATTGCACAGTCG  | 182 | 203 | 0.01 | 341  | 7  | 0.00 | 20.14 |
| apt-183 | GCGAGGAACGAGCCTGGACACACACAATACACCGTTGCCA | 183 | 200 | 0.01 | 168  | 14 | 0.00 | 9.92  |
| apt-184 | GTGCGAAGCGCCTGTACTGTACAACCCATTCTTCTGCCG  | 184 | 199 | 0.01 | 302  | 8  | 0.00 | 17.27 |
| apt-185 | GAGCAACGCGACTGTCTGAGCCAACCTGACACCTAGTGGT | 185 | 198 | 0.01 | 139  | 17 | 0.00 | 8.09  |
| apt-186 | CCCGGAGGGATGGCCAGGCTCCAGAGTCGAACTCTAGACC | 186 | 197 | 0.01 | 408  | 6  | 0.00 | 22.80 |
| apt-187 | CCCGGAGGGATGGCCAGGCTTCAGAGTCGAACTCTAGATC | 187 | 197 | 0.01 | 409  | 6  | 0.00 | 22.80 |

|         |                                           |     |     |      |      |      |      |         |
|---------|-------------------------------------------|-----|-----|------|------|------|------|---------|
| apt-188 | GGCGTAGCACTGTCCCATTCTGACACTATCGCACAGTTG   | 188 | 196 | 0.01 | 202  | 12   | 0.00 | 11.34   |
| apt-189 | GAGCAGCGCGACTGTCCGAGCCAATCCGCCATCCAGTGGT  | 189 | 194 | 0.01 | 439  | 6    | 0.00 | 22.45   |
| apt-190 | GGCACGGTGCTGCAATACTCATGGACAGGTGCGAAGCGCC  | 190 | 193 | 0.01 | 121  | 21   | 0.00 | 6.38    |
| apt-191 | GTGCGAAGCGCCTGGACTACACATCCCATTCCTTCTACCG  | 191 | 193 | 0.01 | 240  | 10   | 0.00 | 13.40   |
| apt-192 | GAGCAACGCGACTGTCTGAACGAATCTGACATCTGGTGAC  | 192 | 191 | 0.01 | 132  | 18   | 0.00 | 7.37    |
| apt-193 | GAGCAACGCGACTGTCTGAGCCAACCTGGCATCTAGTGGT  | 193 | 189 | 0.01 | 194  | 12   | 0.00 | 10.94   |
| apt-194 | GAGCAACGCGACTGTCTGAGTCAACCTGACATCTAGTGGT  | 194 | 189 | 0.01 | 438  | 6    | 0.00 | 21.87   |
| apt-195 | GAGCAACGCGACTGTCTGGACCAATCTGACATCAAGTGGT  | 195 | 189 | 0.01 | 320  | 7    | 0.00 | 18.75   |
| apt-196 | GGCGTAGCACTGTCCCATCCCTGACACTATCGCACAGTCG  | 196 | 189 | 0.01 | 468  | 6    | 0.00 | 21.87   |
| apt-197 | GTGCGAAGCGCCTGTACTGTGCATTCCACTCCTTCTGCCG  | 197 | 189 | 0.01 | 498  | 6    | 0.00 | 21.87   |
| apt-198 | GGCGTAGCACTGTCCCGTTCCTAACACTACCGCACAGTCG  | 198 | 187 | 0.01 | 344  | 7    | 0.00 | 18.55   |
| apt-199 | GTGCGAAGCGCCTGGACTGTACGTCCCACTCTTTCTGCCG  | 199 | 184 | 0.01 | 126  | 20   | 0.00 | 6.39    |
| apt-200 | GAGCAACGCGACTGTCTTAACCAATCTGACATCTGGTGGT  | 200 | 183 | 0.01 | 184  | 13   | 0.00 | 9.77    |
| apt-201 | GAGCAGCGCGACTGTCCGAACCAAACTGACATCTAGTGGT  | 201 | 183 | 0.01 | 280  | 8    | 0.00 | 15.88   |
| apt-202 | GAGCAACGCGACTGTCTGAACCAATCTGACATTTAGTGGT  | 202 | 182 | 0.01 | 5249 | 4    | 0.00 | 31.59   |
| apt-203 | GGCGTAGCACTGTCCCATTCTAACACTATCGCACACTCG   | 203 | 180 | 0.01 | 173  | 14   | 0.00 | 8.93    |
| apt-204 | GCGAGGAACGAGCCTGGACACACACAATACGTCCGTTAGC  | 204 | 178 | 0.01 | 257  | 9    | 0.00 | 13.73   |
| apt-205 | GTGCGAAGCGCCTGGACTGCACATCCCACCCCTTCTGCCG  | 205 | 178 | 0.01 | 349  | 7    | 0.00 | 17.66   |
| apt-206 | GAGCAGCGCGACTGTCCGAGCCAATTCGCCATCTAGTGGT  | 206 | 177 | 0.01 | N/A  | #N/A | N/A  | #VALUE! |
| apt-207 | GGCGTAGCACTGTCCCATTCTAACACTATTTACAGTCG    | 207 | 176 | 0.01 | 222  | 11   | 0.00 | 11.11   |
| apt-208 | GTGCGAAGCGCCTGGACTGCACACCCCATTCCTTCTACCG  | 208 | 176 | 0.01 | 203  | 12   | 0.00 | 10.18   |
| apt-209 | GCGAGGAACGAGCCTGGACACACACAATACGTTCGTTGGC  | 209 | 175 | 0.01 | 258  | 9    | 0.00 | 13.50   |
| apt-210 | GTGCGAAGCGCCTGTACTGTACACCCCGCTCTCTGTTCG   | 210 | 175 | 0.01 | 303  | 8    | 0.00 | 15.19   |
| apt-211 | GAGCAACGCGACTGTCTGAGCCAACCTGACATTTAGTGGT  | 211 | 174 | 0.01 | 252  | 9    | 0.00 | 13.42   |
| apt-212 | GAGCAGCGCGACTGTCCGAGCTAATCCGCCATCTAGTGGT  | 212 | 173 | 0.01 | 5268 | 4    | 0.00 | 30.03   |
| apt-213 | GCACGGTGCTGCAATACTCATGGACAGGAGCAGCGCGACT  | 213 | 173 | 0.01 | 135  | 18   | 0.00 | 6.67    |
| apt-214 | CACGAAGGGCTGGCCGGTTTCAAGGCTGTACTCCAGACC   | 214 | 172 | 0.01 | 130  | 18   | 0.00 | 6.64    |
| apt-215 | GCGAGGAACGAGCCTGGACACGTGCAATACGTCCGTCCGGT | 215 | 172 | 0.01 | 74   | 45   | 0.00 | 2.65    |
| apt-216 | GAGCAGCGCGACTGTCCGAGCCAATCCGTCATCTAGTGGT  | 216 | 171 | 0.01 | 5267 | 4    | 0.00 | 29.69   |
| apt-217 | GACACGGTGCTGCAATACTCATGGACAGGCGAGGTACGAG  | 217 | 170 | 0.01 | 127  | 19   | 0.00 | 6.21    |
| apt-218 | GCACGGTGCTGCAATACTCATGGACAGGTGCGAAGCGCCT  | 218 | 162 | 0.01 | 140  | 17   | 0.00 | 6.62    |
| apt-219 | GAGCAACGCGACTGTCTGGACCAATCTGGCGTCTGGTGGT  | 219 | 160 | 0.01 | 146  | 16   | 0.00 | 6.94    |
| apt-220 | GCGAGGTACGAGCCTGGACACACACAATACATCCGTCGGC  | 220 | 157 | 0.01 | 120  | 21   | 0.00 | 5.19    |
| apt-221 | GGCGTAGCACTGTCCCGTTCCTAACACTACCACACAGTCG  | 221 | 156 | 0.01 | 474  | 6    | 0.00 | 18.05   |
| apt-222 | GCGAGGTACGAGCCTGGACACACACAATACGTCCGTTGCC  | 222 | 152 | 0.01 | 334  | 7    | 0.00 | 15.08   |
| apt-223 | GAGCAACGCGACTGTCTGAGCCAATCTGACATCAAGTGGT  | 223 | 149 | 0.01 | 5256 | 4    | 0.00 | 25.87   |
| apt-224 | GAGCAGCGCGACTGTCCGAGCCAATCCGCCATCTAGCGGT  | 224 | 149 | 0.01 | 324  | 7    | 0.00 | 14.78   |
| apt-225 | GGAGCAAGGCGACCTGGCCCACAAGCAAACCCACCTCGCC  | 225 | 149 | 0.01 | 1095 | 5    | 0.00 | 20.69   |

|         |                                           |     |     |      |        |      |      |         |
|---------|-------------------------------------------|-----|-----|------|--------|------|------|---------|
| apt-226 | CACGTAGGGCTGGCCGGGTCTCGGGATTGTACTACGGATG  | 226 | 148 | 0.01 | 118    | 21   | 0.00 | 4.89    |
| apt-227 | GTGCGAAGCGCCTGGACTGTACATCCCACCCCCTCTGCCG  | 227 | 147 | 0.01 | 495    | 6    | 0.00 | 17.01   |
| apt-228 | GTGCGAAGCGCCTGGACTGTGCATCCCACACCTTTTGTCCG | 228 | 147 | 0.01 | 7668   | 4    | 0.00 | 25.52   |
| apt-229 | GTGCGAAGCGCCTGTACTGCACATCCCATTCCCTTCTACCG | 229 | 147 | 0.01 | 1228   | 5    | 0.00 | 20.42   |
| apt-230 | GGCGTAGCACTGTCCCGTCCCTAACACTACCACACAGTCG  | 230 | 146 | 0.01 | 294    | 8    | 0.00 | 12.67   |
| apt-231 | GGCGTAGCACTGTCCCATTCCTGACACTATCGCACAGTCA  | 231 | 145 | 0.01 | 292    | 8    | 0.00 | 12.59   |
| apt-232 | CACGGAGGGCTGGCCGGGTCTCAGGATTGTACTACGGATG  | 232 | 144 | 0.01 | 188    | 12   | 0.00 | 8.33    |
| apt-233 | GAGCAGCGCGACTGTCTGGACCAATCTGACATTTAGTGGT  | 233 | 144 | 0.01 | 445    | 6    | 0.00 | 16.67   |
| apt-234 | GTGCGAAGCGCCTGGACTGCACATCCCGTTCCTTCTACCG  | 234 | 142 | 0.01 | 1225   | 5    | 0.00 | 19.72   |
| apt-235 | GTGCGAAGCGCCTGGACTGTGCATCCCACCCCCTTCTGCCG | 235 | 142 | 0.01 | 81283  | 3    | 0.00 | 32.87   |
| apt-236 | GTGCGAAGCGCCTGGACTGTACATCCTACTCCCTCTACCG  | 236 | 141 | 0.01 | 288180 | 2    | 0.00 | 48.95   |
| apt-237 | GAGCAACGCGACTGTCCGAGCCAACCTGACATCTAGTGGT  | 237 | 139 | 0.01 | 934    | 5    | 0.00 | 19.30   |
| apt-238 | GGCGTAGCACTGTCCCATTCCTGACGCTATCGCACAGTCG  | 238 | 139 | 0.01 | 471    | 6    | 0.00 | 16.09   |
| apt-239 | GTGCGAAGCGCCTGGACTGCACATCCTACTCCTTCTGCCG  | 239 | 139 | 0.01 | 81275  | 3    | 0.00 | 32.17   |
| apt-240 | GAGCAGCGCGACTGTCCAAGCCAATCCGCCATCTAGTGGT  | 240 | 138 | 0.01 | 54298  | 3    | 0.00 | 31.94   |
| apt-241 | GGCACATTGCAGGGGAGGTGGGTGGGGATGCATCGGCCCG  | 241 | 138 | 0.01 | 69422  | 3    | 0.00 | 31.94   |
| apt-242 | GGCGTAGCACTGTCCCATTCCTGACACTATCGCACAGTCG  | 242 | 138 | 0.01 | 1124   | 5    | 0.00 | 19.17   |
| apt-243 | GGCGTAGCACTGTCTTATTCTGACACTATCGCACAGTCG   | 243 | 138 | 0.01 | 1126   | 5    | 0.00 | 19.17   |
| apt-244 | GAGCAACGCGACTGTCTGAGCCAACCTGACATCTAGCGGT  | 244 | 135 | 0.01 | 319    | 7    | 0.00 | 13.39   |
| apt-245 | GTGCGAAGCGCCTGGACTGCACATCCCATTCCCTCCACCG  | 245 | 134 | 0.01 | 267    | 9    | 0.00 | 10.34   |
| apt-246 | GAGCAACGCGACTGTCTGAACCAACTGACATCTAGTGGT   | 246 | 133 | 0.01 | 5247   | 4    | 0.00 | 23.09   |
| apt-247 | GGCGTAGCACTGTCCCATTCCTGACACTATCGCACTGTCCG | 247 | 133 | 0.01 | 1122   | 5    | 0.00 | 18.47   |
| apt-248 | GGCGTAGCACTGTCCCATTCCTGACACTATCGCATAGTCG  | 248 | 133 | 0.01 | 6799   | 4    | 0.00 | 23.09   |
| apt-249 | GGCGTAGCACTGTCCCATTTCCGACACTATCGCACAGTCA  | 249 | 132 | 0.01 | 293    | 8    | 0.00 | 11.46   |
| apt-250 | GAGCGAAGCGCCTGGACTGCACATCCCATTCCCTTCTACCG | 250 | 131 | 0.01 | 54490  | 3    | 0.00 | 30.32   |
| apt-251 | GTGCAACGCGACTGTCTGAGCCAACCTGACATCTAGTGGT  | 251 | 130 | 0.01 | 266    | 9    | 0.00 | 10.03   |
| apt-252 | GTGCGAAGCGCCTGTACTGTACATCCCCTCCTTCTGCCG   | 252 | 130 | 0.01 | 358    | 7    | 0.00 | 12.90   |
| apt-253 | CCCGGAGGGATGGCCAGGCTTCAGGATCGTACTCTAGACG  | 253 | 129 | 0.01 | 231    | 10   | 0.00 | 8.96    |
| apt-254 | GTGCGAAGCGCCTGCACTGTACATCCCCTCCTTTTGTCCG  | 254 | 129 | 0.01 | 348    | 7    | 0.00 | 12.80   |
| apt-255 | CACGTAGGGCTGGCCGGTCTCCAGTGTCTTACTCCAGGCG  | 255 | 128 | 0.01 | 104    | 26   | 0.00 | 3.42    |
| apt-256 | CCCGAAGGGATGGCCGGTTCAGGATCGTACCCCATACC    | 256 | 128 | 0.01 | N/A    | #N/A | N/A  | #VALUE! |
| apt-257 | GGCGTAGCACTGTCCCATTCCTAACACTACCGCACAGTCG  | 257 | 128 | 0.01 | 291    | 8    | 0.00 | 11.11   |
| apt-258 | GTGCGAAGCGCCTGGACTGTACATCCCCTCCTTCTGCCA   | 258 | 128 | 0.01 | 206    | 12   | 0.00 | 7.41    |
| apt-259 | GAGCAGCGCGACTGTCCGAGCCAATCCGCCATCTAATGGT  | 259 | 127 | 0.01 | 440    | 6    | 0.00 | 14.70   |
| apt-260 | GAGCAGCGTACTGTCCGAGCCAATCCGCCATCTAGTGGT   | 260 | 127 | 0.01 | 54310  | 3    | 0.00 | 29.40   |
| apt-261 | GCGAGGTACGAGCCTGGACACACATAATACATCCGTTGGC  | 261 | 126 | 0.01 | 288    | 8    | 0.00 | 10.94   |
| apt-262 | GTGCGAAGCGCCTGGACTGTACATCCTACTCCTTCTACCG  | 262 | 126 | 0.01 | 7666   | 4    | 0.00 | 21.87   |
| apt-263 | GTGCGAAGCGCCTGTACTGTGCATCCCACACCTTTTGTCCG | 263 | 125 | 0.01 | 288195 | 2    | 0.00 | 43.40   |

|         |                                          |     |     |      |       |      |      |         |
|---------|------------------------------------------|-----|-----|------|-------|------|------|---------|
| apt-264 | GAGCAACGCGACTGTCTGAACCAATCTGACGTCAAGTGGT | 264 | 124 | 0.01 | 249   | 9    | 0.00 | 9.57    |
| apt-265 | GAGCAGCGCGACTGTCCGAGCCAATCCTCCATCTAGTGGT | 265 | 124 | 0.01 | 945   | 5    | 0.00 | 17.22   |
| apt-266 | GAGCAGCGCGACTGTCTGAACCAACTTGGCATCTGGTGGT | 266 | 124 | 0.01 | 5269  | 4    | 0.00 | 21.53   |
| apt-267 | GGCGTAGCACTGTCCCATTCTGACATTATCGCACAGTCG  | 267 | 124 | 0.01 | 342   | 7    | 0.00 | 12.30   |
| apt-268 | GGCGTAGCACTGTCCCATTCTGATACTATCGCACAGTCG  | 268 | 124 | 0.01 | 472   | 6    | 0.00 | 14.35   |
| apt-269 | GAGCGGCGCGACTGTCCGAGCCAATCCGCCATCTAGTGGT | 269 | 123 | 0.01 | 255   | 9    | 0.00 | 9.49    |
| apt-270 | GCGAGGCACGAGCCTGGACACACACAATACGTCCGTTGCC | 270 | 123 | 0.01 | 259   | 9    | 0.00 | 9.49    |
| apt-271 | GTGCGAAGCGCCTGGACTGCATATCCCATTCCTTCTACCG | 271 | 122 | 0.01 | 356   | 7    | 0.00 | 12.10   |
| apt-272 | CACGAAGGGCTGGCCGAGCTTCAAGGTTGTACTCTAGACC | 272 | 121 | 0.01 | 243   | 9    | 0.00 | 9.34    |
| apt-273 | GTGCGAAGCGCCTGGACTGTACATCCCACCCCTTCTGCCA | 273 | 121 | 0.01 | 143   | 17   | 0.00 | 4.94    |
| apt-274 | GAGCAACGCGACTGTCTGAACCAATCTGACATCTGGTGAT | 274 | 119 | 0.01 | 248   | 9    | 0.00 | 9.18    |
| apt-275 | GAGCAACGCGACTGTCTGAACCGATCTGACATCAAGTGGT | 275 | 119 | 0.01 | 435   | 6    | 0.00 | 13.77   |
| apt-276 | GGCGTAGCACTGTCCCGTTCCTAACACCACCACACAGTCG | 276 | 119 | 0.01 | 71413 | 3    | 0.00 | 27.54   |
| apt-277 | GTGCGAAGCGCCTGGACTGCACATCCCACTCCTTCCGCCG | 277 | 118 | 0.01 | 1222  | 5    | 0.00 | 16.39   |
| apt-278 | GTGCGAAGCGCCTGGACTGTACATTCCACTCCCCCTACCG | 278 | 118 | 0.01 | 497   | 6    | 0.00 | 13.66   |
| apt-279 | CACGAAGGGCTGGCCGGTTCCAAGGCTGTACTCCAGACC  | 279 | 117 | 0.01 | 179   | 13   | 0.00 | 6.25    |
| apt-280 | GAGCAACGCGACTGTCTGAACGAATCTGGCATCTGGTGGT | 280 | 117 | 0.01 | N/A   | #N/A | N/A  | #VALUE! |
| apt-281 | GAGCAACGCGACTGCCTGAGCCAACCTGACATCTAGTGGT | 281 | 116 | 0.01 | N/A   | #N/A | N/A  | #VALUE! |
| apt-282 | GCGAGGTACGAGCCTGGACACGCACAATACGTCCATTAGC | 282 | 116 | 0.01 | 6032  | 4    | 0.00 | 20.14   |
| apt-283 | GTGCGAAGCGCCTGGACTGTACATCCTACTCCTTCTGCCA | 283 | 116 | 0.01 | 177   | 14   | 0.00 | 5.75    |
| apt-284 | GTGCGAAGCGCCTGGACTGCACATCCCATCCCTTCTACCG | 284 | 115 | 0.01 | 81273 | 3    | 0.00 | 26.62   |
| apt-285 | GAGCAGCGCGACTGTCCGAACCAAAGTACATCTGGTGGT  | 285 | 114 | 0.01 | 54299 | 3    | 0.00 | 26.39   |
| apt-286 | GAGCAACGCGACTGTCTGAGCCGACCTGACATCTAGTGGT | 286 | 113 | 0.01 | 939   | 5    | 0.00 | 15.69   |
| apt-287 | GAGCAGCGCGACTGTCCGAACCAAAGTACATCAAGTGGT  | 287 | 113 | 0.01 | 279   | 8    | 0.00 | 9.81    |
| apt-288 | GAGCAGCGCGACTGTCCGAGCCAATCCGCCATCTACTGGT | 288 | 113 | 0.01 | 441   | 6    | 0.00 | 13.08   |
| apt-289 | GAGCAACGCGACTGTCTGAACCAATCTGACGTCTGGTGGT | 289 | 112 | 0.01 | 54219 | 3    | 0.00 | 25.92   |
| apt-290 | GCGAGGTACGAGCCTGGACACGCACAATACGTCCATTGGC | 290 | 112 | 0.01 | 6033  | 4    | 0.00 | 19.44   |
| apt-291 | GGCGTAGCACTGTCCCGTTCCTAACACTACCACACAGCCG | 291 | 112 | 0.01 | 475   | 6    | 0.00 | 12.96   |
| apt-292 | GAGCAACGCGACTGTCTGAGCTAACCTGACATCTAGTGGT | 292 | 111 | 0.01 | N/A   | #N/A | N/A  | #VALUE! |
| apt-293 | GCGAGGTACGAGCCTGGACACACACAATACATCCATTGGC | 293 | 111 | 0.01 | 285   | 8    | 0.00 | 9.63    |
| apt-294 | GGCGTAGCACTGTCCCATTTCTGACACTATCGCACAGTCG | 294 | 111 | 0.01 | 71410 | 3    | 0.00 | 25.69   |
| apt-295 | GGCGTAGCACTGTCCCGCTCCTAACACTACCACACAGTCG | 295 | 111 | 0.01 | 71412 | 3    | 0.00 | 25.69   |
| apt-296 | GTGCGAAGCGCCTGGACTGTACATCCCACCCCTTCTACCG | 296 | 111 | 0.01 | 81277 | 3    | 0.00 | 25.69   |
| apt-297 | CACGAAGGGCTGGCCGAGCTTCAGGATCATACTCCAGGTC | 297 | 109 | 0.01 | 225   | 10   | 0.00 | 7.57    |
| apt-298 | GTGCGAAGCGCCTGTACTGTACATCCCGCTCCTTCTGCCG | 298 | 108 | 0.01 | 81289 | 3    | 0.00 | 25.00   |
| apt-299 | GACGTAGCACTGTCCCATTCTGACACTATCGCACAGTCG  | 299 | 107 | 0.01 | 317   | 7    | 0.00 | 10.61   |
| apt-300 | GGCGTAGCACTGCCCATTCCTGACACTATCGCACAGTCG  | 300 | 107 | 0.01 | 6792  | 4    | 0.00 | 18.57   |
| apt-301 | GTGCGAAGCGCCTGGACTGTGCATCCCACTCCCTCTACCG | 301 | 106 | 0.01 | 81284 | 3    | 0.00 | 24.54   |



|         |                                           |     |     |      |        |      |      |         |
|---------|-------------------------------------------|-----|-----|------|--------|------|------|---------|
| apt-302 | GAGCAGCGCGACTGTCCGAGCCAATCCGCTATCTAGTGGT  | 302 | 105 | 0.01 | 442    | 6    | 0.00 | 12.15   |
| apt-303 | GAGCAGCGCGACTGTCTGAACCAATCCGCCATCTAGTGGT  | 303 | 105 | 0.01 | 54306  | 3    | 0.00 | 24.30   |
| apt-304 | GAGCAACGCGACTGTCTGAAGCAATCTGGCATCTGGTGGT  | 304 | 104 | 0.01 | 436    | 6    | 0.00 | 12.04   |
| apt-305 | GAGCAACGCGACTGTCTGAGCCAGCCTGACATCTAGTGGT  | 305 | 104 | 0.01 | 5258   | 4    | 0.00 | 18.05   |
| apt-306 | GAGCAGCGCGACTGTCCGAGCCAATCCGCCATCAAGTGGT  | 306 | 104 | 0.01 | N/A    | #N/A | N/A  | #VALUE! |
| apt-307 | GGCGTAGCACTGTCCCGTTCCTAACACTACCACACGGTTCG | 307 | 104 | 0.01 | 343    | 7    | 0.00 | 10.32   |
| apt-308 | CACGAAGGGCTGGCCGAGCTCCAGGATCGTATTCCAGTTC  | 308 | 103 | 0.01 | 207    | 11   | 0.00 | 6.50    |
| apt-309 | GGCGTAGCACTGTCCATTCTGACACTGTCGCACAGTCG    | 309 | 103 | 0.01 | 6802   | 4    | 0.00 | 17.88   |
| apt-310 | GCGAGGAACGAGCCTGGACACGTGCAATACGTCCGTTGGC  | 310 | 101 | 0.01 | N/A    | #N/A | N/A  | #VALUE! |
| apt-311 | GTGCGAAGCGCCTGGACTGTACGTCCCACTCCCTCTACCG  | 311 | 101 | 0.01 | N/A    | #N/A | N/A  | #VALUE! |
| apt-312 | GTTGCGAAAGACAACGAATGCTTTGCCTGCCATAATTTGC  | 312 | 101 | 0.01 | 310455 | 2    | 0.00 | 35.07   |
| apt-313 | CCCGGAGGGATGGCCAGGCTTCAGGGTCGTA CTCCAGACC | 313 | 99  | 0.01 | N/A    | #N/A | N/A  | #VALUE! |
| apt-314 | GTGCGAAGCGCCTGGACTGCACGTCCATTCTCTACCG     | 314 | 99  | 0.01 | 355    | 7    | 0.00 | 9.82    |
| apt-315 | CACGGAGGGCTGGCCAGGCTTCAATGTCATACTCCAGACG  | 315 | 98  | 0.01 | 79     | 38   | 0.00 | 1.79    |
| apt-316 | CACGTAGGGCTGGCCGGTTTCAGAGTCATACTCCAGTCG   | 316 | 98  | 0.01 | 191    | 12   | 0.00 | 5.67    |
| apt-317 | GAGCAGCGCGACTGCCCGAGCCAATCCGCCATCTAGTGGT  | 317 | 98  | 0.01 | 278    | 8    | 0.00 | 8.51    |
| apt-318 | GGGAGGTGGCGGGTGTACGTGCCACGCTTTCGTGTATG    | 318 | 98  | 0.01 | 223    | 11   | 0.00 | 6.19    |
| apt-319 | CACGTAGGGCTGGCCAGGCTTCAAGATCGTGCTCCAGATG  | 319 | 97  | 0.01 | 227    | 10   | 0.00 | 6.74    |
| apt-320 | GAGCAACGCGACTGTCTGAAACAATCTGGCATCTAGTGGT  | 320 | 97  | 0.01 | N/A    | #N/A | N/A  | #VALUE! |
| apt-321 | GAGCAACGCGACTGTCTGAGCCAACCTGACATCCAGTGGT  | 321 | 97  | 0.01 | 937    | 5    | 0.00 | 13.47   |
| apt-322 | GAGCAACGCGACTGTCTGAACCAACCTGACATCTGGTGGT  | 322 | 96  | 0.01 | 5246   | 4    | 0.00 | 16.67   |
| apt-323 | GAGCAACGCGACTGTCTGAACCAATCTGACGTCTAGTGGT  | 323 | 96  | 0.01 | N/A    | #N/A | N/A  | #VALUE! |
| apt-324 | GAGCAGCGCGACTGTCTGAACCAATCCGACATCTGGTGGT  | 324 | 96  | 0.01 | 444    | 6    | 0.00 | 11.11   |
| apt-325 | GTGCGAAGCGCCTGTACTGTACACCTCACTCCCTCTACCG  | 325 | 96  | 0.01 | 81286  | 3    | 0.00 | 22.22   |
| apt-326 | GAGCAACGCGACTGTCCGAACCAATCCGCCATCTAGTGGT  | 326 | 95  | 0.01 | 54205  | 3    | 0.00 | 21.99   |
| apt-327 | GCGAGGTACGAGCCTGGACACACACAATACATCCGTTACC  | 327 | 95  | 0.01 | 217    | 11   | 0.00 | 6.00    |
| apt-328 | GTGCGAAGCGCCTGGACTGCACACCCCACTCCTTCTGCCG  | 328 | 95  | 0.01 | 288153 | 2    | 0.00 | 32.98   |
| apt-329 | CACGAAGGGCTGGCCGGTCTCAGAGTCATACTCCAGACG   | 329 | 94  | 0.01 | 72     | 46   | 0.00 | 1.42    |
| apt-330 | GAGCAACGCGACTGTCTAAGCCAACCTGACATCTAGTGGT  | 330 | 94  | 0.01 | N/A    | #N/A | N/A  | #VALUE! |
| apt-331 | GTGCGAAGCGCCTGGACTGCACATCCCACTCCTTTTGCCA  | 331 | 94  | 0.01 | 81271  | 3    | 0.00 | 21.76   |
| apt-332 | GCAACGTGGTGTGCAATACTCATGGACAGGAGCAACGCG   | 332 | 93  | 0.01 | 972    | 5    | 0.00 | 12.92   |
| apt-333 | GAGCAACGCGACTGTCTGAGCCAACCCGCCATCTAGTGGT  | 333 | 92  | 0.01 | N/A    | #N/A | N/A  | #VALUE! |
| apt-334 | GCGAGGCACGAGCCTGGACACACACAATACGTCCGTTGGA  | 334 | 92  | 0.01 | 102    | 27   | 0.00 | 2.37    |
| apt-335 | GCGAGGTACGAGCCTGGACACACATAATACGTCCGTTGCC  | 335 | 92  | 0.01 | 237    | 10   | 0.00 | 6.39    |
| apt-336 | GGCGTAGCACTGTCCATTCTGACACTATCGTACAGTCG    | 336 | 92  | 0.01 | 1123   | 5    | 0.00 | 12.78   |
| apt-337 | CACGAAGGGCTGGCCGAGCTTCAGAGTCGAACTCTAGACC  | 337 | 91  | 0.01 | 381    | 6    | 0.00 | 10.53   |
| apt-338 | CACGAAGGGCTGGCCGGTACGGTGTGTACTCTAGACC     | 338 | 91  | 0.01 | 305    | 7    | 0.00 | 9.03    |
| apt-339 | GCGAGGTACGAGCCTGGACACACACAATACTCATGGACAG  | 339 | 91  | 0.01 | 220    | 11   | 0.00 | 5.74    |

|         |                                           |     |    |      |        |      |      |         |
|---------|-------------------------------------------|-----|----|------|--------|------|------|---------|
| apt-340 | GACGTGGTGCTGCAATACTCATGGACAGGAGCAACGCGAC  | 340 | 90 | 0.01 | 5185   | 4    | 0.00 | 15.62   |
| apt-341 | GAGCAACGCGACTGTCCGGACCAATCTGGCATCTAGTGGT  | 341 | 90 | 0.01 | N/A    | #N/A | N/A  | #VALUE! |
| apt-342 | GAGCAACGCGACTGTCTAAACCAATCTGACATCAAGTGGT  | 342 | 90 | 0.01 | 54207  | 3    | 0.00 | 20.83   |
| apt-343 | GTGGTCGGGGTGGGTGGTGGGTTTGTATTGCCTGTCGACG  | 343 | 90 | 0.01 | 34     | 117  | 0.01 | 0.53    |
| apt-344 | GACGTGGTGCTGCAATACTCATGGACAGGGCGTAGCACTG  | 344 | 89 | 0.01 | 318    | 7    | 0.00 | 8.83    |
| apt-345 | GAGCAACGCGACTGTCTGAACCAATCCGACATCAAGTGGT  | 345 | 89 | 0.01 | 5248   | 4    | 0.00 | 15.45   |
| apt-346 | GAGCAGCGCGACTGTCCGAACCAATCTGACATCAAGTGGT  | 346 | 89 | 0.01 | N/A    | #N/A | N/A  | #VALUE! |
| apt-347 | GAGCAGCGCGACTGTCCGGACCAATCTGGCATCTGGTGGT  | 347 | 89 | 0.01 | N/A    | #N/A | N/A  | #VALUE! |
| apt-348 | GCAACGTGGTGCTGCAATACTCATGGACAGGGCGTAGCAC  | 348 | 89 | 0.01 | 281    | 8    | 0.00 | 7.73    |
| apt-349 | GCGAGGAACGAGCCTGGACACACACAATACGTCCGTTGCC  | 349 | 89 | 0.01 | 63107  | 3    | 0.00 | 20.60   |
| apt-350 | GCGAGGTACGAGCCTGGACACACATAATACGTCCGTTAGC  | 350 | 89 | 0.01 | 63172  | 3    | 0.00 | 20.60   |
| apt-351 | GTGCGAAGCGCCTGGACTGCACATCCCACTCTTTCTGCCG  | 351 | 89 | 0.01 | 288161 | 2    | 0.00 | 30.90   |
| apt-352 | CACGAAGGGCTGGCCGAGCTTCAGGGTCGTACTCCAGACC  | 352 | 88 | 0.01 | N/A    | #N/A | N/A  | #VALUE! |
| apt-353 | GAGCAACGCGACTGTCTGAATCAACCTGACATCTAGTGGT  | 353 | 88 | 0.01 | 5250   | 4    | 0.00 | 15.28   |
| apt-354 | GAGCAGCGCGACTATCCGAGCCAATCCGCCATCTAGTGGT  | 354 | 88 | 0.01 | N/A    | #N/A | N/A  | #VALUE! |
| apt-355 | GTGCGAAGCGCCTGGACTGCACATCCCACTCCTCCTGCCG  | 355 | 88 | 0.01 | 7652   | 4    | 0.00 | 15.28   |
| apt-356 | GTGCGAAGCGCCTGGACTGTACACCCCACTCCCTCTACCG  | 356 | 88 | 0.01 | 357    | 7    | 0.00 | 8.73    |
| apt-357 | GGCGTAGCACTGTCCCGTTCCTAGCACTACCACACAGTCG  | 357 | 87 | 0.01 | 1125   | 5    | 0.00 | 12.08   |
| apt-358 | GGGAGGCGGGTGGGTCGTCGGGGTGCCTCGTTCTGTGTGC  | 358 | 86 | 0.01 | 295    | 8    | 0.00 | 7.46    |
| apt-359 | GTGCGAAGCGCCTGGACTGTGCATCCCACTTCTGCCA     | 359 | 86 | 0.01 | 301    | 8    | 0.00 | 7.46    |
| apt-360 | GAGCAGCGCGACTGTCCGAGCCAATCCGCCATCTAGTGGG  | 360 | 85 | 0.01 | 197    | 12   | 0.00 | 4.92    |
| apt-361 | GGCGTAGCACTGTCCCATTCTGACACTATCGCACCGTCCG  | 361 | 85 | 0.01 | 71409  | 3    | 0.00 | 19.67   |
| apt-362 | GGCGTAGCACTGTCCCGTTCCTAACACTACCACGCAGTCG  | 362 | 85 | 0.01 | N/A    | #N/A | N/A  | #VALUE! |
| apt-363 | CACGAAGGGCTGGCCGAACCTCAGGGTCGTACTCCAGACC  | 363 | 84 | 0.01 | N/A    | #N/A | N/A  | #VALUE! |
| apt-364 | GAGCAACGCGACTGTCTGAACCAAACCTGACATCTGGCGGT | 364 | 84 | 0.01 | N/A    | #N/A | N/A  | #VALUE! |
| apt-365 | GCGAGGTACGAGCCTGGACACACGCAATACGTCCATTGGC  | 365 | 84 | 0.01 | 289    | 8    | 0.00 | 7.29    |
| apt-366 | GTGCGAAGCGCCTGGACTGCGCATCCCATTCCTTCTACCG  | 366 | 84 | 0.01 | 299    | 8    | 0.00 | 7.29    |
| apt-367 | CACGAAGGGCTGGCCGGGTTTCAGGATTGTACTACGATG   | 367 | 83 | 0.01 | 23916  | 3    | 0.00 | 19.21   |
| apt-368 | CACGAAGGGCTGGCCGGGTTTCAGGGTCATACACCAGTCA  | 368 | 83 | 0.01 | 117    | 21   | 0.00 | 2.74    |
| apt-369 | GACGGGGTGCTGCAATACTCATGGACAGGCGAGGTACGAG  | 369 | 83 | 0.01 | 232    | 10   | 0.00 | 5.76    |
| apt-370 | GCGAGGAACGAGCCTGGACACACACAATAGGTCCGTTGGC  | 370 | 83 | 0.01 | 332    | 7    | 0.00 | 8.23    |
| apt-371 | GGCGTAGCACTGTCCCATTCTAACACTATCGCACAATCG   | 371 | 83 | 0.01 | 469    | 6    | 0.00 | 9.61    |
| apt-372 | GGCGTAGCACTGTCTCATTCTGACACTATCGCACAGTCG   | 372 | 83 | 0.01 | 1128   | 5    | 0.00 | 11.53   |
| apt-373 | GGGACGGAACGGACCCTGCCAACACAAGCCGAATGTGCC   | 373 | 83 | 0.01 | N/A    | #N/A | N/A  | #VALUE! |
| apt-374 | CACGGAGGGCTGGCCAGGCTTCAAGGTTGTGCTCCAGATG  | 374 | 82 | 0.01 | 155    | 15   | 0.00 | 3.80    |
| apt-375 | CACGTAGGGCTGGCCAGGCTTCAAGGCTATACTCCAGACC  | 375 | 82 | 0.01 | N/A    | #N/A | N/A  | #VALUE! |
| apt-376 | GAGCAACGCGACTGTCTGAACCAATCTGACATCTGGCGGT  | 376 | 82 | 0.01 | N/A    | #N/A | N/A  | #VALUE! |
| apt-377 | GAGCGAAGCGCCTGGACTGTACATCCCACTCCCTCTACCG  | 377 | 82 | 0.01 | 950    | 5    | 0.00 | 11.39   |

|         |                                           |     |    |      |        |      |      |         |
|---------|-------------------------------------------|-----|----|------|--------|------|------|---------|
| apt-378 | GGCGTAGCACTGTCCTGTTCCCTAACACTACCACACAGTCG | 378 | 82 | 0.01 | 71423  | 3    | 0.00 | 18.98   |
| apt-379 | GTGCGAAGCGCCTGGACTGTACATCCCCTCCCTCCACCG   | 379 | 82 | 0.01 | 1227   | 5    | 0.00 | 11.39   |
| apt-380 | GAGCAACGCGACTGTCTGAACCAATCCGGCATCTAGTGGT  | 380 | 81 | 0.00 | 54212  | 3    | 0.00 | 18.75   |
| apt-381 | GCGAGGAACGAGCCTGGACACGCACAATACGTCCGTTGGC  | 381 | 81 | 0.00 | N/A    | #N/A | N/A  | #VALUE! |
| apt-382 | GTGCGAAGCGCCTGGACTGCACATCCCCTCTTTTGCCG    | 382 | 81 | 0.00 | 351    | 7    | 0.00 | 8.04    |
| apt-383 | GTGCGAAGCGCCTGGACTGCACATCCCATTCCTTCGACCG  | 383 | 81 | 0.00 | 352    | 7    | 0.00 | 8.04    |
| apt-384 | GAGCAACGCGACTGTCTGAACCAATCTGACATCGAGTGGT  | 384 | 80 | 0.00 | N/A    | #N/A | N/A  | #VALUE! |
| apt-385 | GAGCAACGCGACTGTCTGAGCCAACCTGATATCTAGTGGT  | 385 | 80 | 0.00 | N/A    | #N/A | N/A  | #VALUE! |
| apt-386 | GAGCAGCGCGACTGTCCGAGCCAATCCGCCATCTAGTAGT  | 386 | 80 | 0.00 | N/A    | #N/A | N/A  | #VALUE! |
| apt-387 | GAGCAGCGCGACTGTCCGAGCCAGTCCGCCATCTAGTGGT  | 387 | 80 | 0.00 | N/A    | #N/A | N/A  | #VALUE! |
| apt-388 | GGAGCAAGGCGACCTGGCCACAAACAAACCCACTTCGCC   | 388 | 80 | 0.00 | 149952 | 2    | 0.00 | 27.78   |
| apt-389 | GGCGTAGCACTGTCCCATTCTGACACTATCGCACAATCG   | 389 | 80 | 0.00 | 71408  | 3    | 0.00 | 18.52   |
| apt-390 | GTGCGAAGCGCCTGGACTGTACATCCCACCCCTTCTACCG  | 390 | 80 | 0.00 | N/A    | #N/A | N/A  | #VALUE! |
| apt-391 | GAGCAGAGCGACTGTCCGAGCCAATCCGCCATCTAGTGGT  | 391 | 79 | 0.00 | 54290  | 3    | 0.00 | 18.29   |
| apt-392 | GGCGTAGCACTGTCCCGTTCCTAACATTACCACACAGTCG  | 392 | 79 | 0.00 | 182332 | 2    | 0.00 | 27.43   |
| apt-393 | GAGCAACGCGACTGTCCGAACCAATCTGACATCAAGTGGT  | 393 | 78 | 0.00 | 933    | 5    | 0.00 | 10.83   |
| apt-394 | GGCGTAGCACTGTCCCGTTCCTAACACTACCACACAGTCA  | 394 | 78 | 0.00 | 71416  | 3    | 0.00 | 18.05   |
| apt-395 | GGCGTAGCACTGTCCCGTTCCTAACACTATCGCACAGTCA  | 395 | 78 | 0.00 | N/A    | #N/A | N/A  | #VALUE! |
| apt-396 | CACGGAGGGCTGGCCAGGCTTCAGGGCTATACTCCAGACC  | 396 | 76 | 0.00 | N/A    | #N/A | N/A  | #VALUE! |
| apt-397 | GACGTGGTGCTGCAATACTCATGGACAGGTGCGAAGCGCC  | 397 | 76 | 0.00 | 432    | 6    | 0.00 | 8.80    |
| apt-398 | GGCGCAAGGCGACCTGGCCACAAGCAAACCCACTTCGCC   | 398 | 76 | 0.00 | N/A    | #N/A | N/A  | #VALUE! |
| apt-399 | GGGAGGCGGGTGGGTTCGTCGGGGTGTGTCTGTGTGG     | 399 | 76 | 0.00 | 345    | 7    | 0.00 | 7.54    |
