# Supplementary figures and images for: The application of aptamer Apt-236 targeting PvpA protein in the detection of antibodies against Mycoplasma gallisepticum
Source: Royal Society of Chemistry journal article supplement (doi:10.1039/d1ay00515d), 2021-01-01

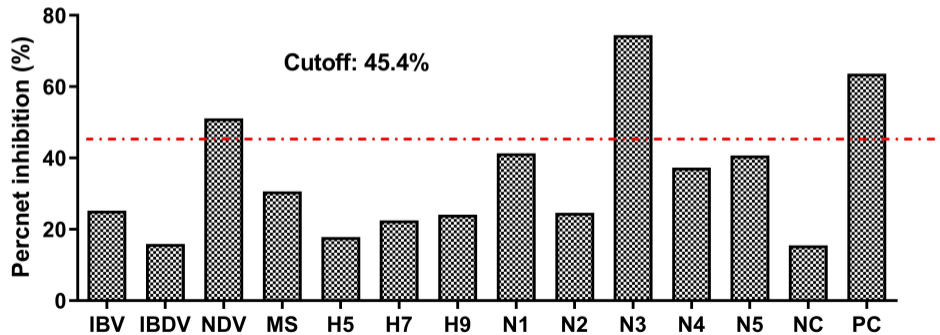

Supplement: d1ay00515d2.pdf [file d1ay00515d2.pdf]
